# Supplementary material
Source: publisher figshare collection journal article supplement (https://acs.figshare.com/ndownloader/files/34012564)
Supplement: Supplementary file 1 [file 34012564]

Supporting Information:

**Surface and structural dependent reactivity of titanium oxide nanostructures with 2-chloroethyl ethyl sulfide under ambient conditions**

Spencer L. Giles<sup>1\*</sup>, Anastasia Kastl<sup>2</sup>, Andrew P. Purdy<sup>1</sup>, Asher C. Leff<sup>3,4</sup>, Daniel C. Ratchford<sup>1</sup>, William A. Maza<sup>1</sup>, and Olga A. Baturina<sup>1</sup>

<sup>1</sup>Chemistry Division, United States Naval Research Laboratory, Washington, D.C., 20375, United States of America

<sup>2</sup>NREIP Intern, Chemistry Division, United States Naval Research Laboratory, Washington, D.C., 20375, United States of America

<sup>3</sup>Sensors & Electron Devices Directorate, US Army Research Laboratory, Adelphi, MD, 20783, United States of America

<sup>4</sup>General Technical Services, Adelphi, MD, 20783, United States of America

\*Corresponding author: spencer.giles@nrl.navy.mil

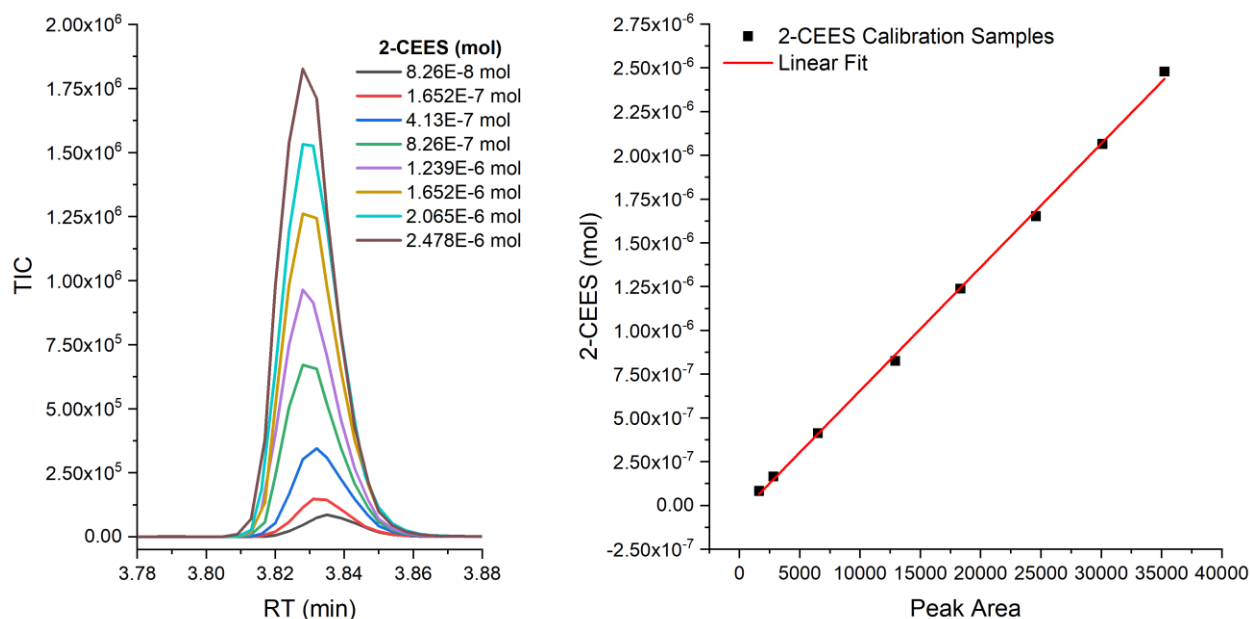

Figure S1. GC-MS concentration analysis of 2-CEES and corresponding peak area-concentration calibration curve.

Table S1. 2-CEES calibration curve data.

|                     |             |               |
|---------------------|-------------|---------------|
| Intercept           | -4.99984E-8 | ± 1.68335E-8  |
| Slope               | 7.05485E-11 | ± 8.27843E-13 |
| Reduced Chi-Squared | 7.71603E-16 |               |
| Pearson's r         | 0.99959     |               |
| R-Square            | 0.99917     |               |

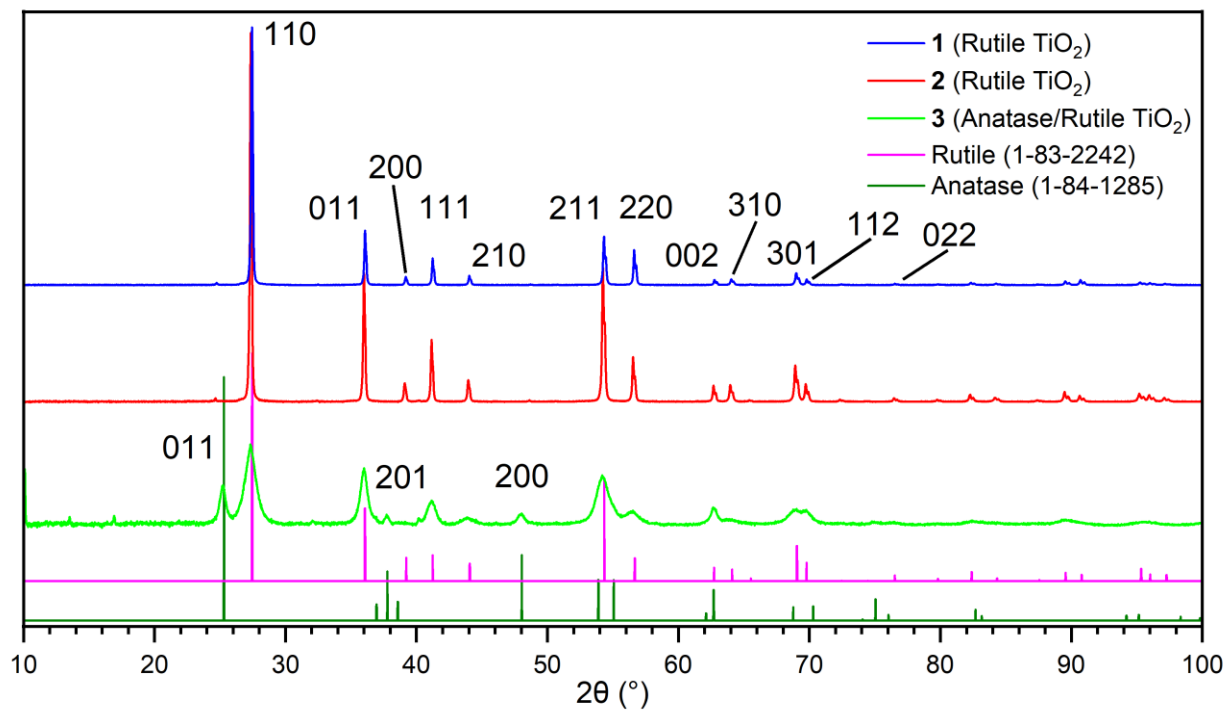

Figure S2. PXRD patterns of materials **1-3** with comparative standard data for Rutile and Anatase  $\text{TiO}_2$  phases.

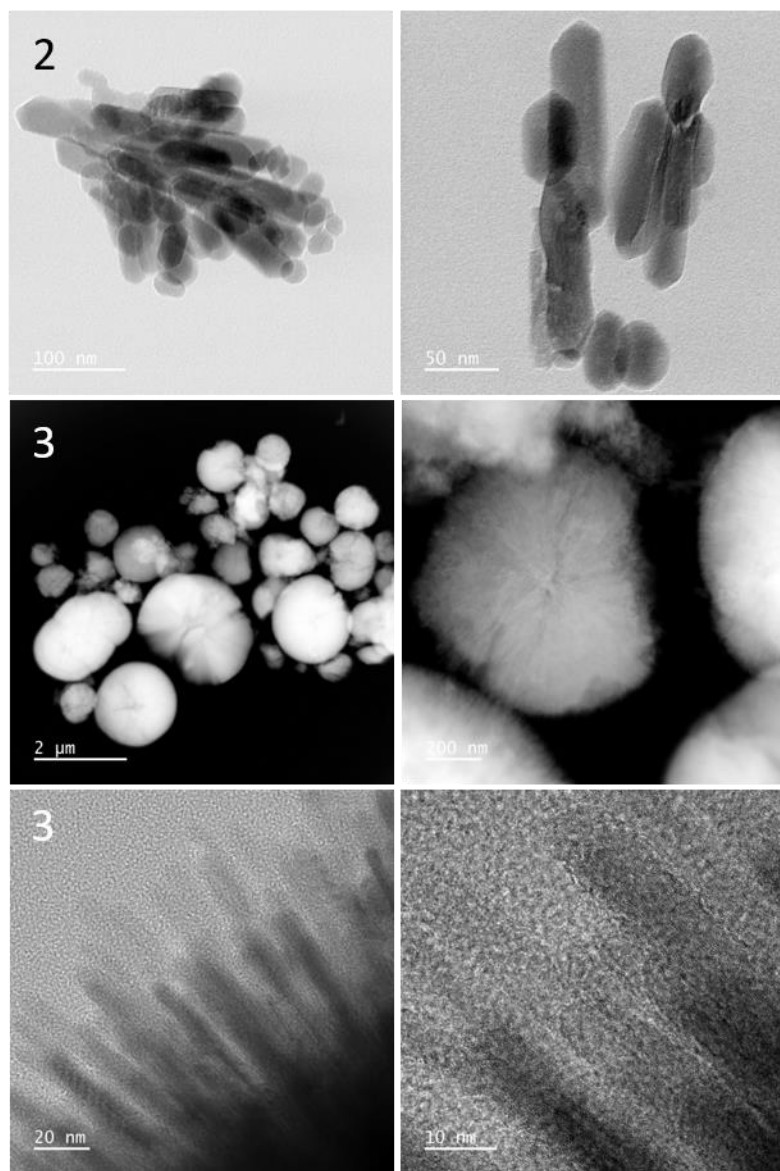

Figure S3. STEM-BF images of material **2**, STEM-HAADF images of material **3**, and HRTEM images of material **3**.

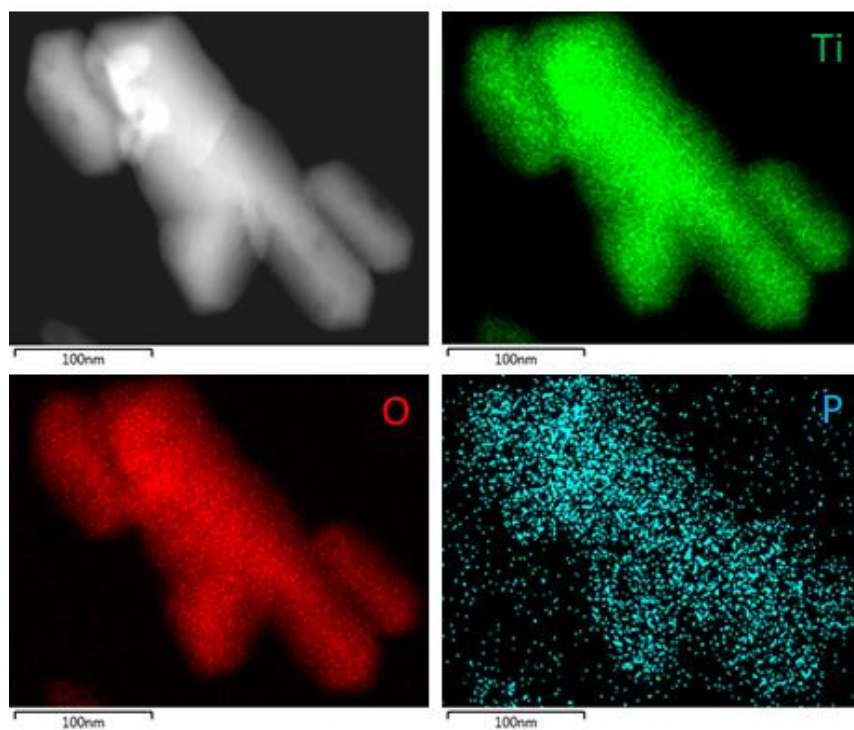

Figure S4. EDS mapping of Ti, O, and P for material **2**.

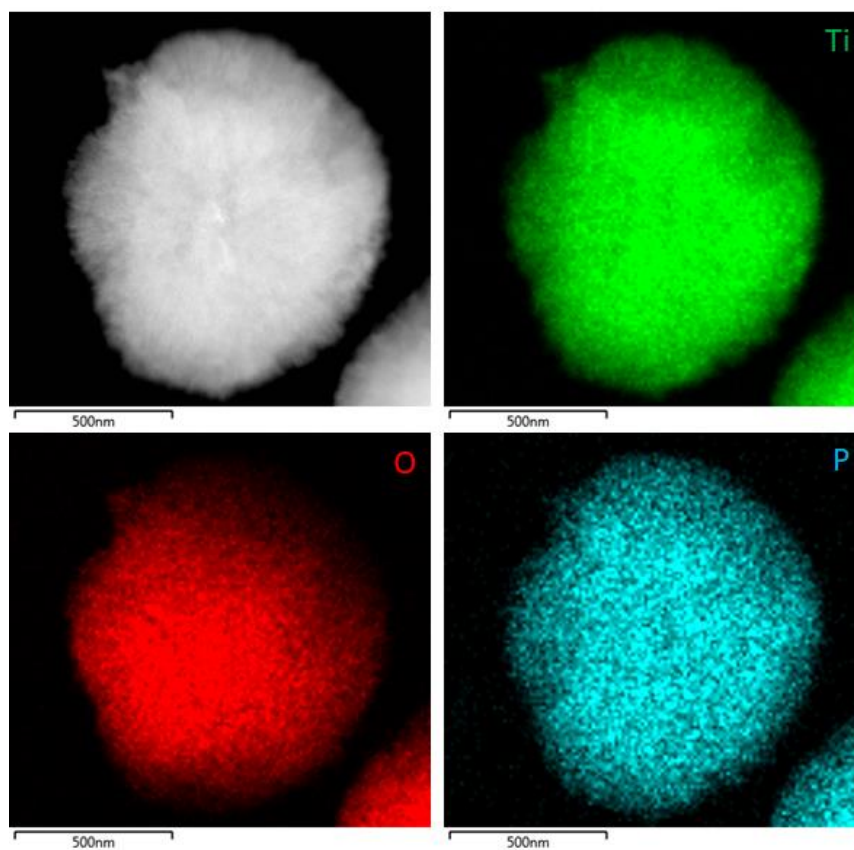

Figure S5. EDS mapping of Ti, O, and P for material **3**.

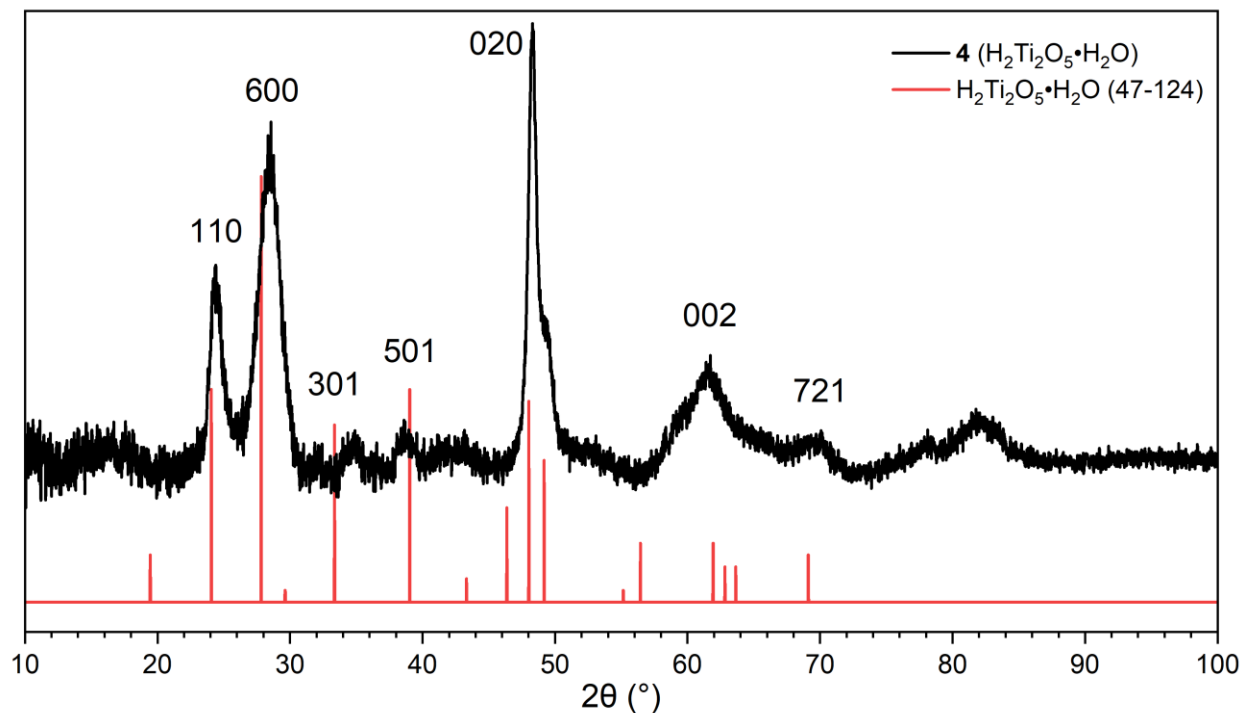

Figure S6. PXRD patterns of materials **4** with comparative standard data for  $\text{H}_2\text{Ti}_2\text{O}_5 \cdot \text{H}_2\text{O}$ .

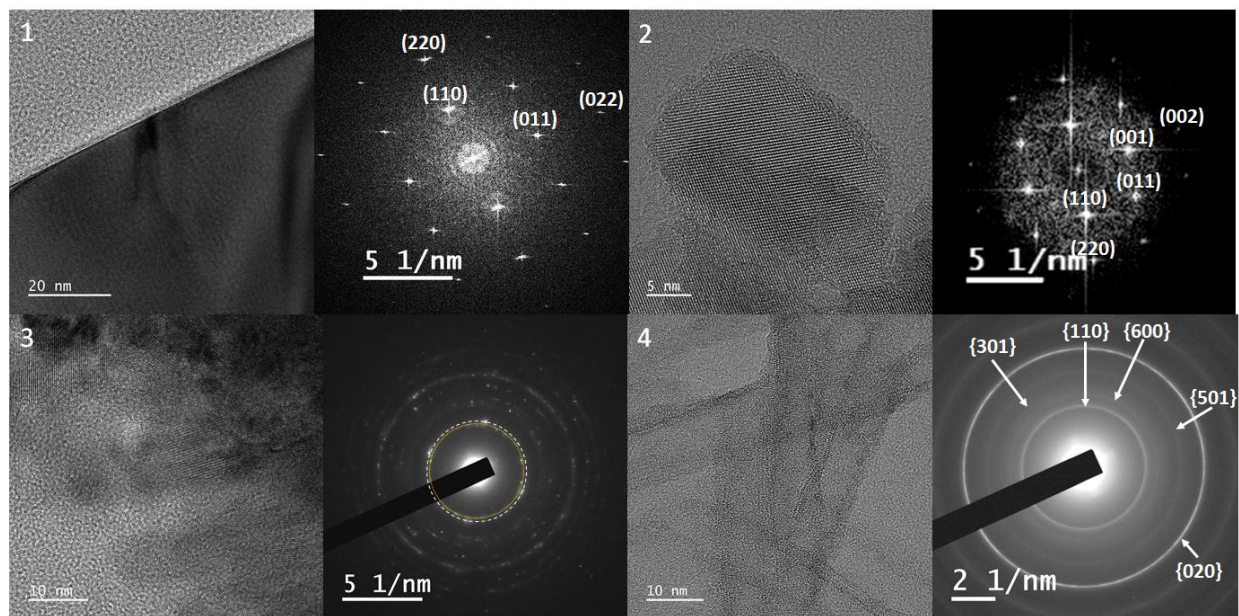

Figure S7. High-resolution TEM images and FFT/SAED analysis of the materials **1-4**. For materials **1** and **2**, the corresponding FFT reflections are labeled with matching crystal planes for the rutile structure. Note that the 001 plane reflection observed for material **2** is forbidden due to the laws of diffraction so it is not observed in XRD. For material **3** the SAED pattern is annotated with an orange dotted circle over the reflections for the anatase {011} planes and a white dashed circle over the reflections for the rutile {110} planes. For material **4**, the rings in the SAED pattern are labeled with the corresponding families of planes in the  $\text{H}_2\text{Ti}_2\text{O}_5 \cdot \text{H}_2\text{O}$  structure.

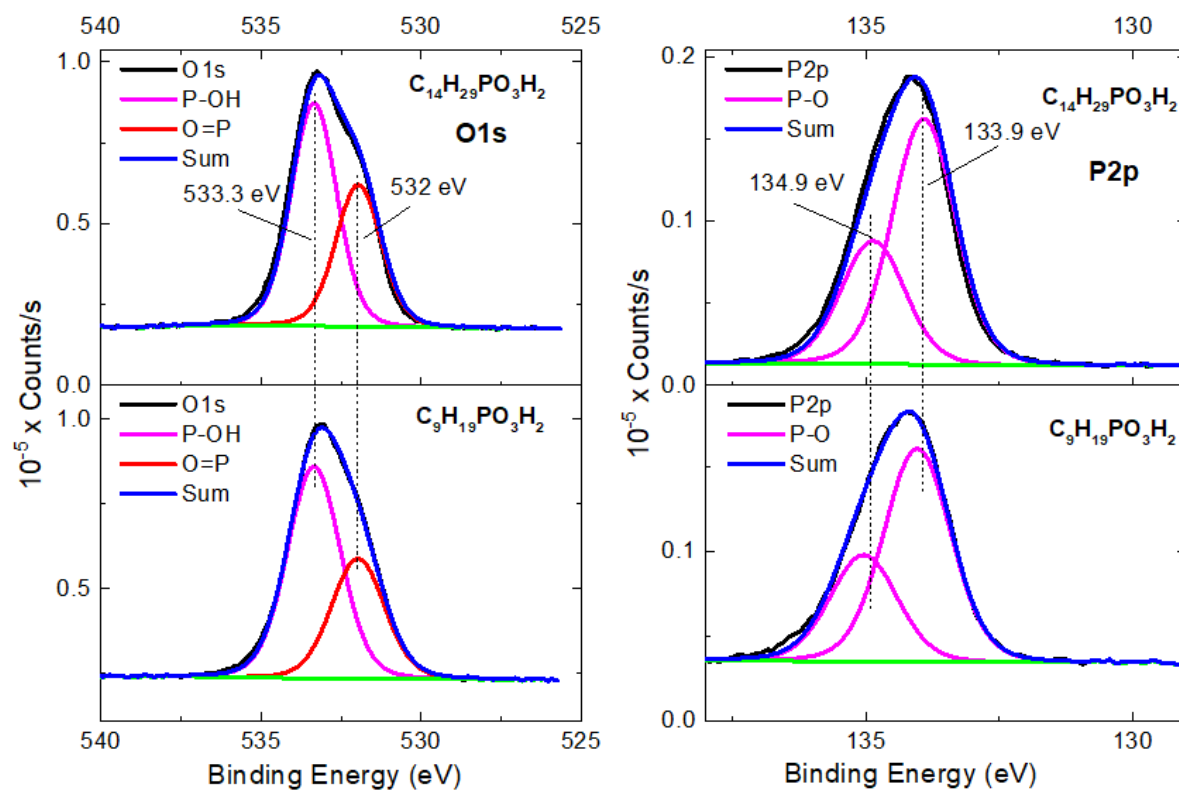

Figure S8. O1s and P2p core level spectra of neat  $C_{14}H_{29}CO_3H_2$  and  $C_9H_{19}CO_3H_2$  phosphonic acids.

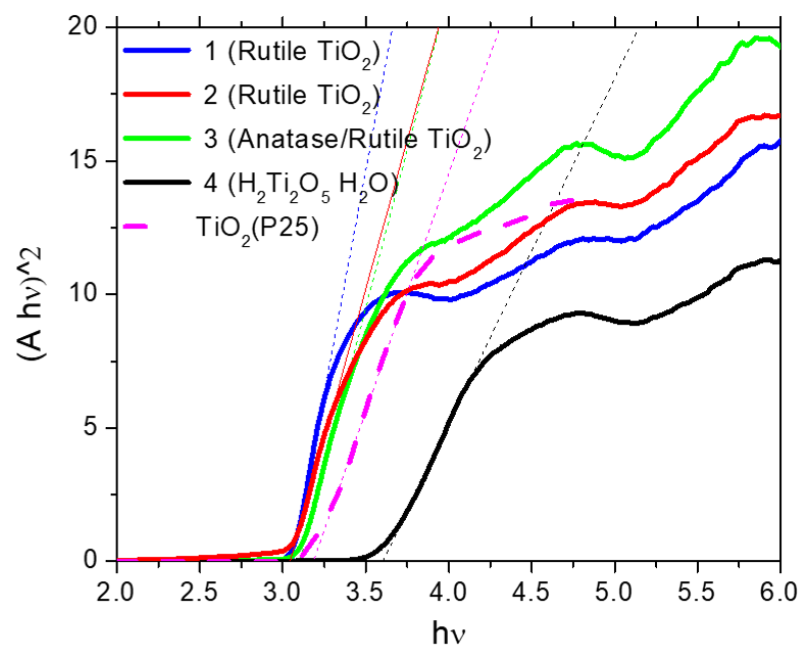

Figure S9. Tauc plots for band gap determinations of materials **1-4**. The plot for P25  $\text{TiO}_2$  is shown as a reference.

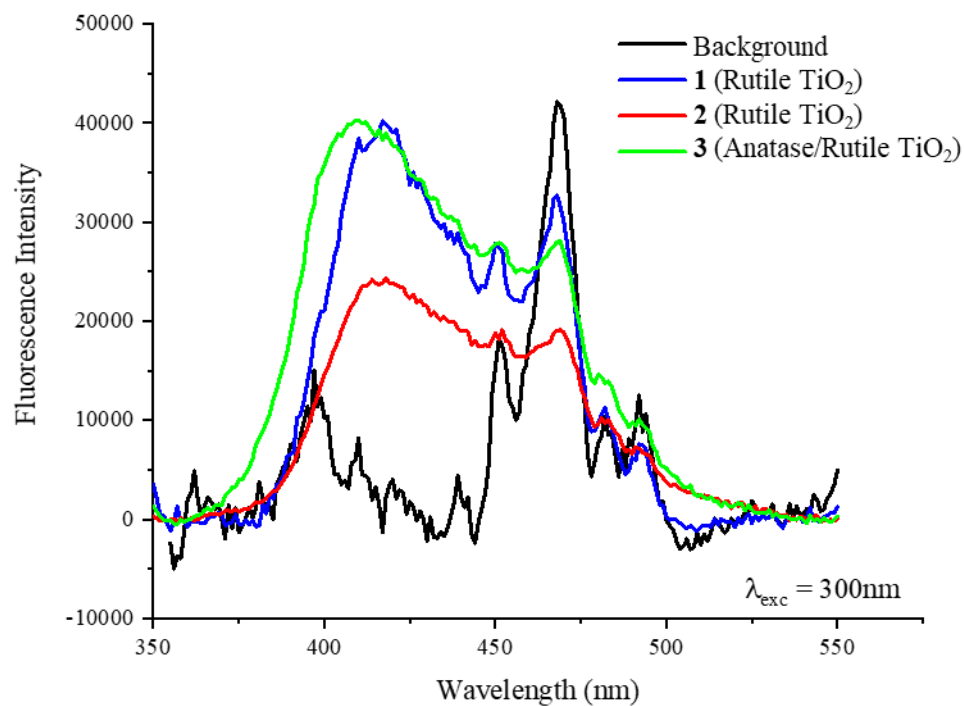

Figure S10. Photoluminescence spectra of materials **1-3** with corresponding background spectra to illustrate features attributed to background scattering from the glass slide substrate.



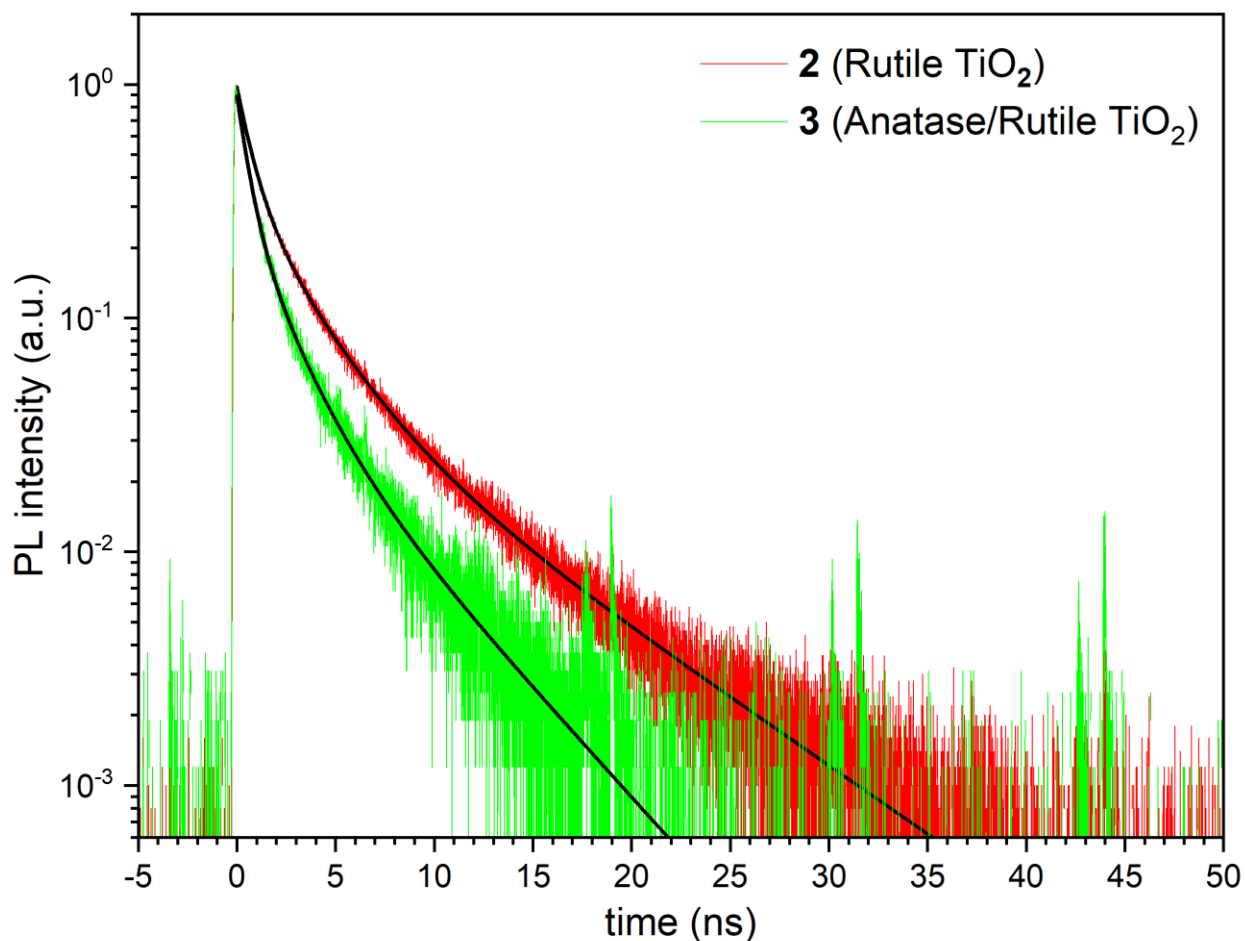

Figure S11. Photoluminescence lifetimes of materials **2** and **3** obtained using the time-correlated single photon counting method. Excitations were performed using  $\sim 120$  fs pulses at a wavelength of 370 nm, and the time-resolved total integrated emission intensity  $> 480$  nm was obtained with a long pass filter and a fast photodiode detector.

Table S2. Results of the fit of the photoluminescence lifetime decays.

| Material | $f_1$ | $\tau_1$ (ns) | $f_2$ | $\tau_2$ (ns) | $f_3$ | $\tau_3$ (ns) | $\tau_{\text{avg}}$ (ns) |
|----------|-------|---------------|-------|---------------|-------|---------------|--------------------------|
| 1        | --    | --            | --    | --            | --    | --            | --                       |
| 2        | 0.59  | 0.720         | 0.32  | 2.58          | 0.07  | 7.44          | 3.54                     |
| 3        | 0.58  | 0.555         | 0.25  | 1.75          | 0.06  | 4.67          | 2.22                     |



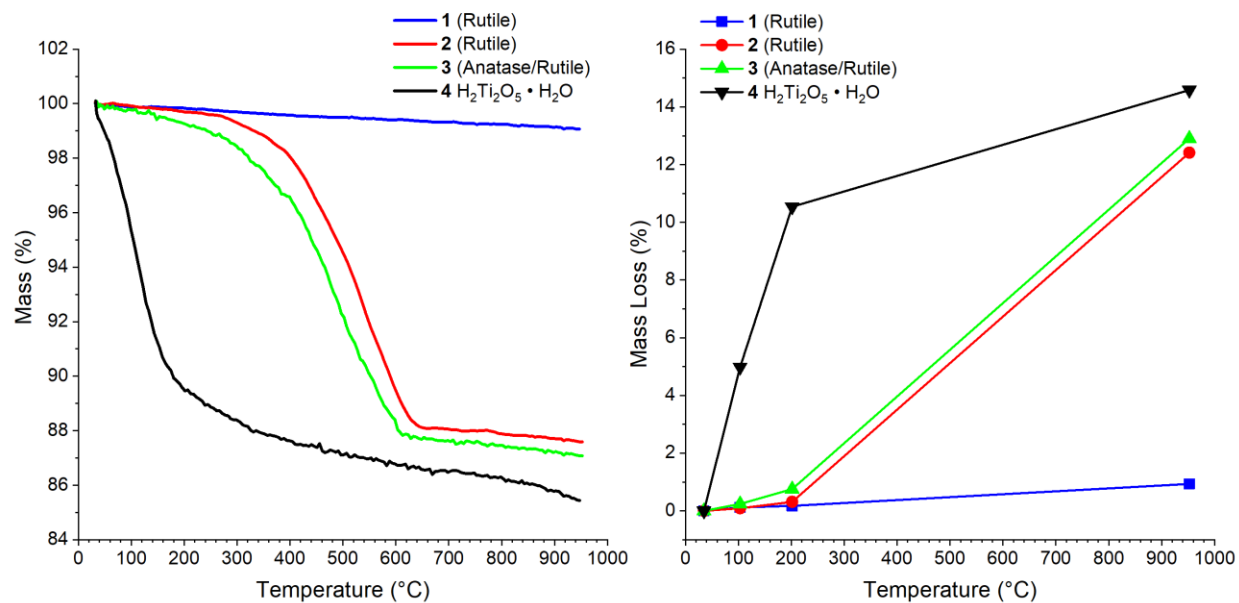

Figure S12. Thermal gravimetric analysis thermal grams of synthesized materials **1-4** and corresponding mass loss plot.

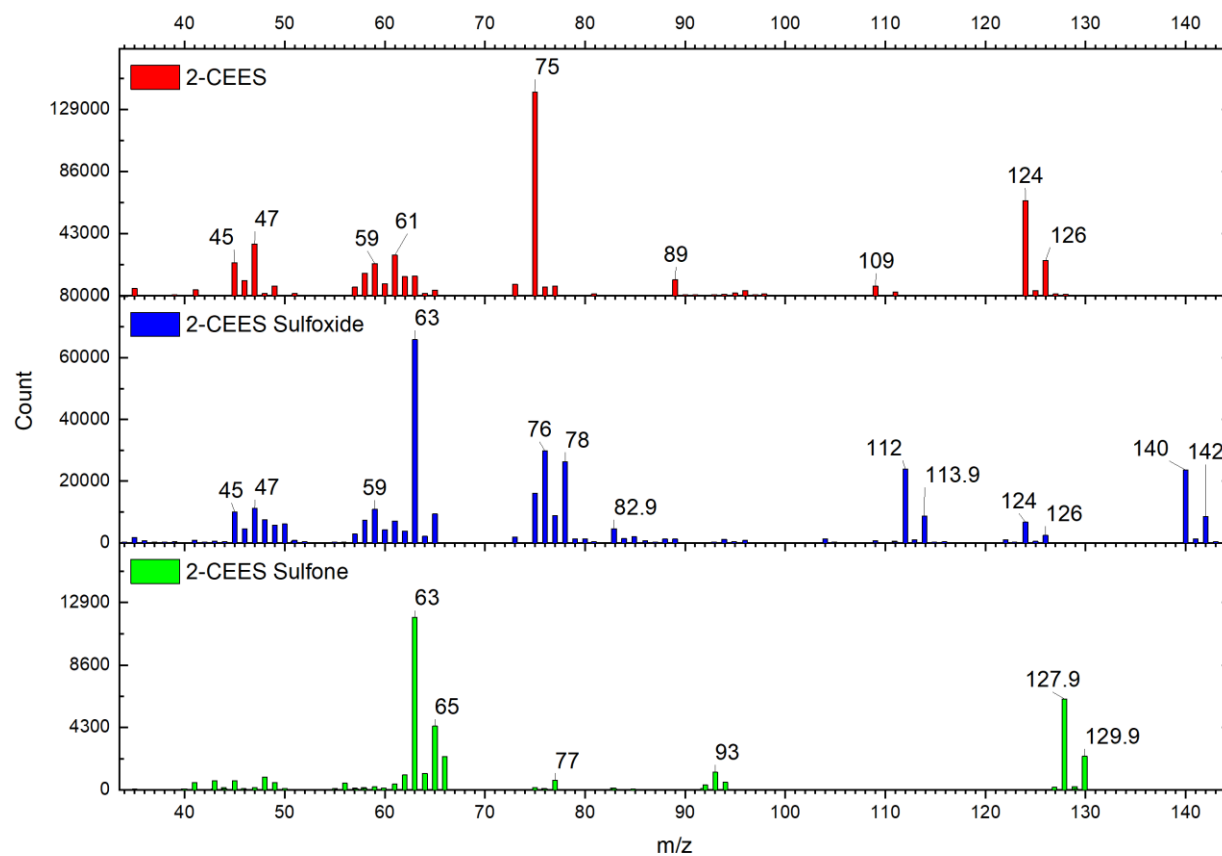

Figure S13. Mass fragmentation pattern comparisons 2-CEES and the oxidation products from challenges with  $\text{TiO}_2$  material **2**.

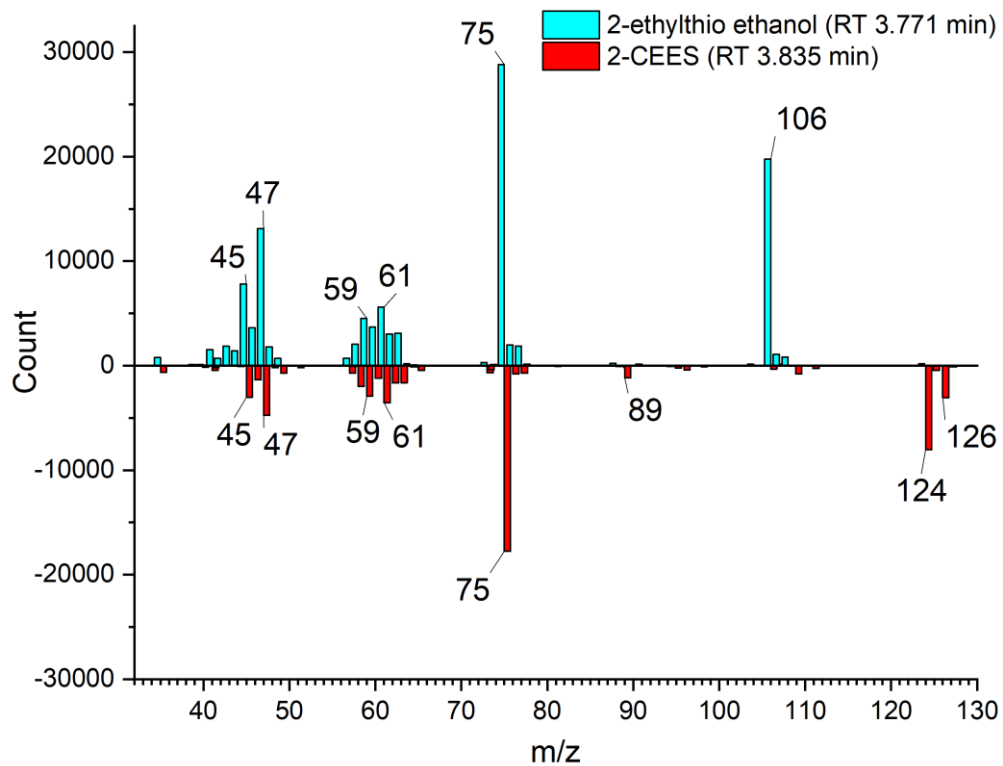

Figure S14. Head to tail comparison of mass spectrum fragmentation patterns from peaks in the gas chromatography trace in the one-hour material **4** ( $\text{H}_2\text{Ti}_2\text{O}_5 \cdot \text{H}_2\text{O}$ ) challenges (Figure 7). Products are identified as 2-ethylthio ethanol (RT 3.771 min) and 2-CEES (RT 3.835 min).

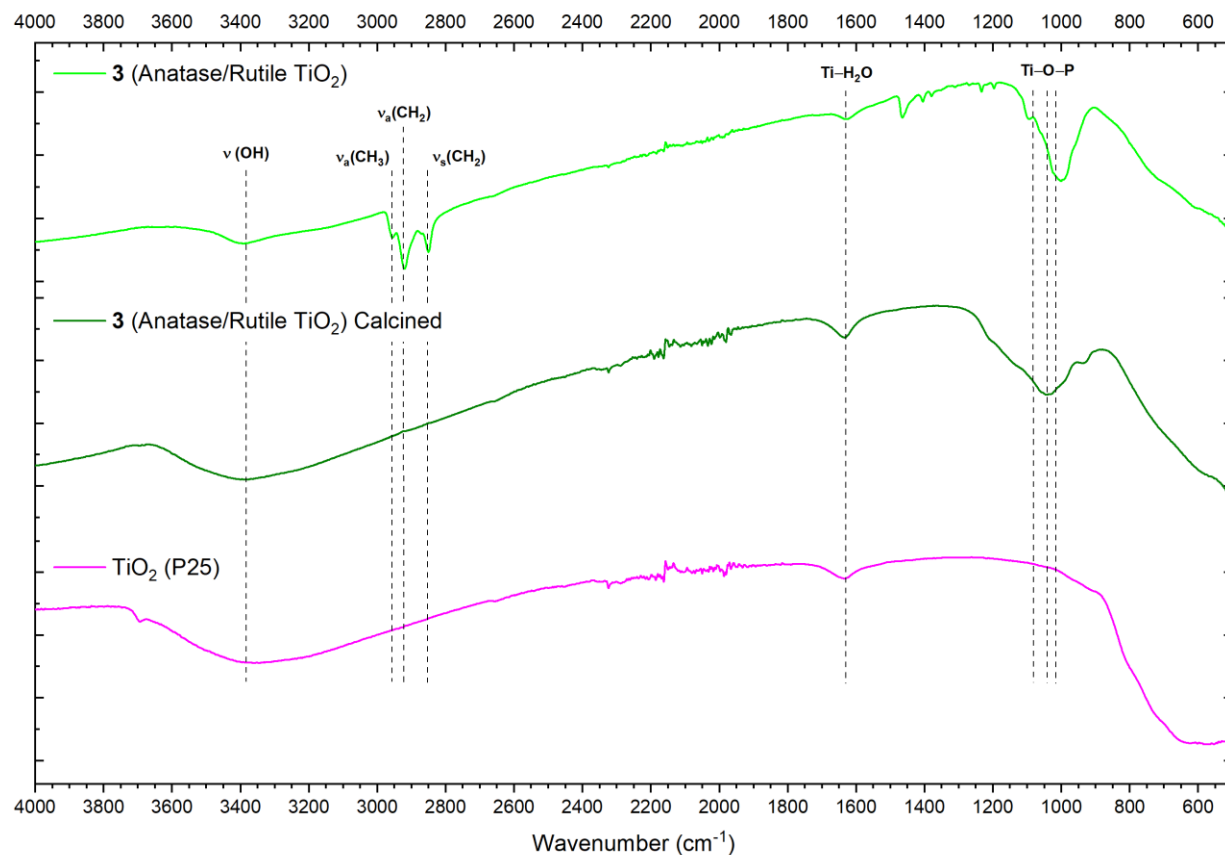

Figure S15. Infrared spectra of the material **3**-pre and post calcination in comparison with P25  $\text{TiO}_2$  to show surface bound phosphates post calcination. Infrared spectra were collected by ATR on a diamond window and are displayed as % transmission.

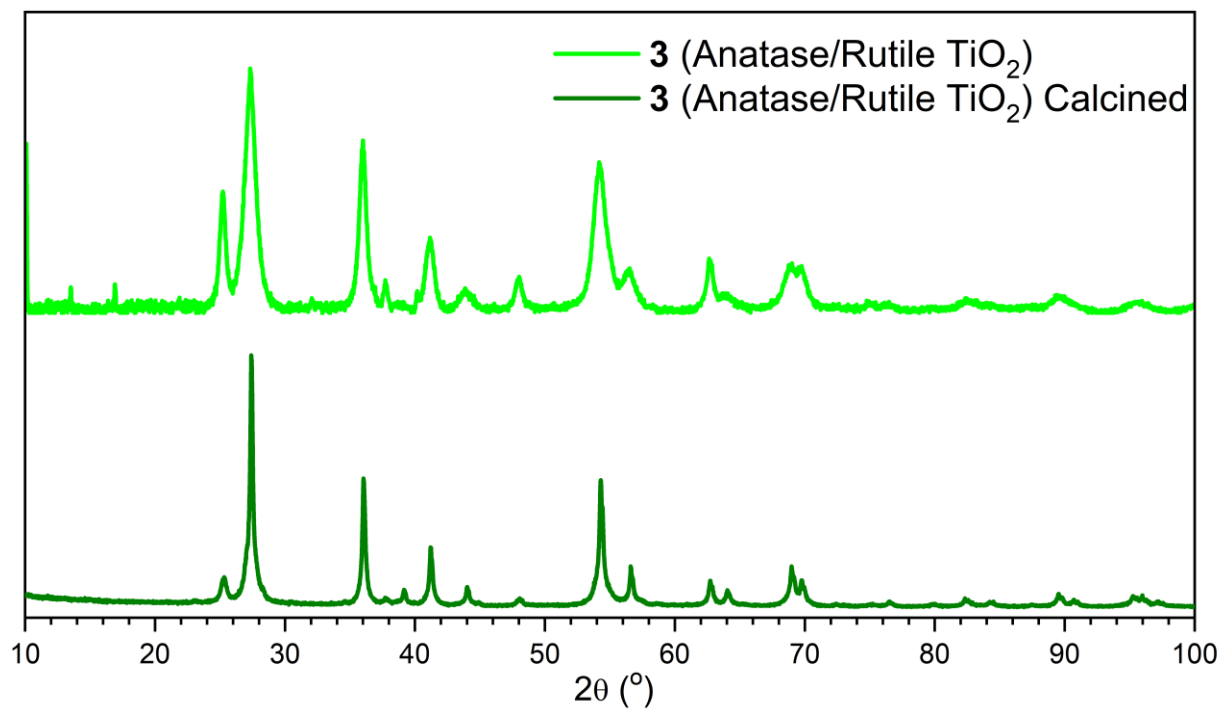

Figure S16. PXRD patterns of material **3** before and after calcination
